# Supplementary material for: Discontinuities in the Value of Relational Capital: The Effects on Employee Entrepreneurship and Mobility
Source: Atypon-hosted journal article supplement (doi:10.1287/orsc.2018.1262), 2019-08-28
Supplement: orsc.2018.1262.sm1.pdf [file orsc.2018.1262.sm1.pdf]

**Table A1: Robustness Checks: Alternate Samples<sup>a</sup>**

| DV's                         | Sample : Excluding In-house Lobbyists |                        |                          |                        | Sample : Firms larger than 5 Employees |                        |                          |                       | Sample : Multiple Team Lobbying Firms |                        |                          |                      |
|------------------------------|---------------------------------------|------------------------|--------------------------|------------------------|----------------------------------------|------------------------|--------------------------|-----------------------|---------------------------------------|------------------------|--------------------------|----------------------|
|                              | Logit<br>Exit                         |                        | Logit<br>Spin-out   Exit |                        | Logit<br>Exit                          |                        | Logit<br>Spin-out   Exit |                       | Logit<br>Exit                         |                        | Logit<br>Spin-out   Exit |                      |
|                              | Model 1                               | Model 2                | Model 3                  | Model 4                | Model 5                                | Model 6                | Model 7                  | Model 8               | Model 9                               | Model 10               | Model 11                 | Model 12             |
| # of Client Ties             | -0.0159***<br>(0.0048)                | -0.0159***<br>(0.0048) | 0.0116*<br>(0.0059)      | 0.0111+<br>(0.0060)    | 0.0001<br>(0.0029)                     | -0.0000<br>(0.0029)    | 0.0166**<br>(0.0061)     | 0.0161**<br>(0.0062)  | -0.0096**<br>(0.0036)                 | -0.0096**<br>(0.0036)  | 0.0148+<br>(0.0088)      | 0.0147<br>(0.0090)   |
| Lobbyist's Revenue           | 0.0000**<br>(0.0000)                  | 0.0000**<br>(0.0000)   | -0.0000<br>(0.0000)      | -0.0000<br>(0.0000)    | -0.0000<br>(0.0000)                    | -0.0000<br>(0.0000)    | -0.0000<br>(0.0000)      | -0.0000<br>(0.0000)   | 0.0000<br>(0.0000)                    | 0.0000<br>(0.0000)     | -0.0000<br>(0.0000)      | -0.0000<br>(0.0000)  |
| Tenure in Lobbying Firm      | 0.0050<br>(0.0176)                    | 0.0051<br>(0.0176)     | -0.0598+<br>(0.0313)     | -0.0649*<br>(0.0322)   | -0.0083<br>(0.0152)                    | -0.0083<br>(0.0152)    | -0.0353<br>(0.0373)      | -0.0353<br>(0.0374)   | 0.0955***<br>(0.0197)                 | 0.0954***<br>(0.0198)  | -0.0981*<br>(0.0426)     | -0.1029*<br>(0.0428) |
| Specialization               | -0.1086<br>(0.2205)                   | -0.1081<br>(0.2199)    | 0.1848<br>(0.4460)       | 0.1586<br>(0.4449)     | -0.0250<br>(0.2546)                    | -0.0280<br>(0.2545)    | 0.2574<br>(0.5412)       | 0.2512<br>(0.5281)    | 0.0215<br>(0.3541)                    | 0.0209<br>(0.3545)     | -0.2280<br>(0.5615)      | -0.2247<br>(0.5518)  |
| # of Ties to Politicians     | 0.3484***<br>(0.0823)                 | 0.3487***<br>(0.0825)  | 0.0684<br>(0.1703)       | 0.0763<br>(0.1720)     | 0.1224<br>(0.0848)                     | 0.1218<br>(0.0850)     | 0.1396<br>(0.2006)       | 0.1569<br>(0.1984)    | 0.1931+<br>(0.1070)                   | 0.1920+<br>(0.1071)    | 0.0533<br>(0.2366)       | 0.0890<br>(0.2379)   |
| Political Contribution       | 0.1906+<br>(0.1065)                   | 0.1908+<br>(0.1064)    | 0.5548*<br>(0.2377)      | 0.5950*<br>(0.2403)    | 0.1360<br>(0.1158)                     | 0.1350<br>(0.1162)     | 0.7894***<br>(0.2320)    | 0.7931***<br>(0.2346) | -0.0065<br>(0.1309)                   | -0.0069<br>(0.1309)    | 0.8649**<br>(0.3107)     | 0.8617**<br>(0.3149) |
| Competitive Overlap          | -0.0001<br>(0.0001)                   | -0.0001<br>(0.0001)    | 0.0003+<br>(0.0002)      | 0.0003+<br>(0.0002)    | -0.0000<br>(0.0001)                    | -0.0000<br>(0.0001)    | 0.0001<br>(0.0002)       | 0.0001<br>(0.0002)    | 0.0000<br>(0.0001)                    | 0.0000<br>(0.0001)     | 0.0001<br>(0.0002)       | 0.0001<br>(0.0002)   |
| Firm Age                     | -0.0199<br>(0.0135)                   | -0.0199<br>(0.0135)    | 0.0463<br>(0.0301)       | 0.0499+<br>(0.0297)    | -0.0165<br>(0.0154)                    | -0.0163<br>(0.0154)    | -0.0209<br>(0.0351)      | -0.0153<br>(0.0348)   | -0.1980***<br>(0.0155)                | -0.1980***<br>(0.0155) | -0.0118<br>(0.0333)      | -0.0031<br>(0.0325)  |
| Firm Size                    | -0.0011<br>(0.0028)                   | -0.0011<br>(0.0028)    | -0.0026<br>(0.0060)      | -0.0028<br>(0.0062)    | -0.0005<br>(0.0029)                    | -0.0005<br>(0.0029)    | -0.0015<br>(0.0068)      | -0.0017<br>(0.0070)   | 0.0005<br>(0.0028)                    | 0.0006<br>(0.0028)     | 0.0029<br>(0.0070)       | 0.0025<br>(0.0071)   |
| Law Firm                     | 0.0524<br>(0.1240)                    | 0.0523<br>(0.1241)     | 0.3878+<br>(0.2194)      | 0.3919+<br>(0.2197)    | -0.1086<br>(0.1295)                    | -0.1077<br>(0.1291)    | 0.4984+<br>(0.2669)      | 0.5211+<br>(0.2690)   | -0.1098<br>(0.1427)                   | -0.1085<br>(0.1426)    | 0.4886<br>(0.3119)       | 0.4903<br>(0.3137)   |
| Lobbying Firm                |                                       |                        |                          |                        | -1.4330***<br>(0.1739)                 | -1.4301***<br>(0.1742) | 0.0682<br>(0.3603)       | 0.0713<br>(0.3481)    | -2.0441***<br>(0.3014)                | -2.0483***<br>(0.3017) | -0.7028<br>(0.8664)      | -0.7629<br>(0.8305)  |
| Firm-Employee Distance       | -0.0546<br>(0.3965)                   | -0.0419<br>(0.4132)    | 0.2390<br>(0.5856)       | -0.2863<br>(0.6612)    | 0.8888*<br>(0.3587)                    | 0.8273*<br>(0.3732)    | -0.2126<br>(0.6983)      | -0.7326<br>(0.7228)   | 1.0725**<br>(0.3935)                  | 1.0377*<br>(0.4178)    | -0.3263<br>(0.7275)      | -0.7645<br>(0.7365)  |
| Discontinuous Increase       | 1.6052***<br>(0.1996)                 | 1.6219***<br>(0.2786)  | 0.6902*<br>(0.3208)      | 0.0962<br>(0.4139)     | 2.1052***<br>(0.2244)                  | 1.9772***<br>(0.2833)  | 0.7863*<br>(0.3657)      | 0.1530<br>(0.5048)    | 2.0858***<br>(0.2660)                 | 1.9833***<br>(0.3655)  | 1.0589*<br>(0.4299)      | 0.3406<br>(0.6358)   |
| Discontinuous X Distance     |                                       | -0.1169<br>(1.2961)    |                          | 4.3376*<br>(2.0660)    |                                        | 0.8709<br>(1.2843)     |                          | 4.0643+<br>(2.2595)   |                                       | 0.5213<br>(1.2442)     |                          | 3.6382<br>(2.4633)   |
| Constant                     | -3.0326***<br>(0.2622)                | -3.0349***<br>(0.2594) | -2.0294***<br>(0.5750)   | -1.9527***<br>(0.5772) | -1.7539***<br>(0.2604)                 | -1.7443***<br>(0.2588) | -2.1039***<br>(0.6188)   | -2.0438**<br>(0.6225) | -0.5427<br>(0.4247)                   | -0.5282<br>(0.4237)    | -0.7679<br>(1.2661)      | -0.6394<br>(1.2620)  |
| Period Fixed-effects         | Y                                     | Y                      | Y                        | Y                      | Y                                      | Y                      | Y                        | Y                     | Y                                     | Y                      | Y                        | Y                    |
| Party Fixed-effects          | Y                                     | Y                      | Y                        | Y                      | Y                                      | Y                      | Y                        | Y                     | Y                                     | Y                      | Y                        | Y                    |
| Chamber Fixed-effects        | Y                                     | Y                      | Y                        | Y                      | Y                                      | Y                      | Y                        | Y                     | Y                                     | Y                      | Y                        | Y                    |
| Party Majority Fixed-effects | Y                                     | Y                      | Y                        | Y                      | Y                                      | Y                      | Y                        | Y                     | Y                                     | Y                      | Y                        | Y                    |
| Log pseudolikelihood         | -1468.27                              | -1468.27               | -253.15                  | -250.75                | -1282.23                               | -1281.95               | -220.36                  | -218.21               | -964.12                               | -964.04                | -174.12                  | -172.76              |
| N                            | 8704                                  | 8704                   | 424                      | 424                    | 6655                                   | 6655                   | 401                      | 401                   | 6007                                  | 6007                   | 326                      | 326                  |

a. Standard errors clustered by connected politicians. \*\*\*  $p < 0.001$ , \*\*  $p < 0.01$ , \*  $p < 0.05$ , +  $p < 0.10$ . The results are robust to the exclusion of firms with a single registered lobbyist (M1-M4), the exclusion of lobbyists working in small firms (M5-M8), and the exclusion of lobbyists where all lobbyists in the firm jointly participate in lobbying deals (M9-12). We conclude that the results are not an artifact of lobbyists with no variation in the firm-employee distance measure or small firms.

Table A2: Robustness Checks: Independent Variables<sup>a</sup>

| DVs                          | Variable : Chair Assignments Only |                        |                        |                        | Sample : Close Congressional Elections |                        |                       |                       |
|------------------------------|-----------------------------------|------------------------|------------------------|------------------------|----------------------------------------|------------------------|-----------------------|-----------------------|
|                              | Logit Exit                        |                        | Logit Spin-out   Exit  |                        | Logit Exit                             |                        | Logit Spin-out   Exit |                       |
|                              | Model 1                           | Model 2                | Model 3                | Model 4                | Model 5                                | Model 6                | Model 7               | Model 8               |
| # of Client Ties             | -0.0027<br>(0.0027)               | -0.0027<br>(0.0027)    | 0.0136**<br>(0.0052)   | 0.0134*<br>(0.0053)    | 0.0022<br>(0.0046)                     | -0.0007<br>(0.0036)    | 0.0176*<br>(0.0086)   | 0.0183*<br>(0.0087)   |
| Lobbyist's Revenue           | -0.0000<br>(0.0000)               | -0.0000<br>(0.0000)    | -0.0000<br>(0.0000)    | -0.0000<br>(0.0000)    | -0.0000**<br>(0.0000)                  | -0.0000**<br>(0.0000)  | 0.0000<br>(0.0000)    | 0.0000<br>(0.0000)    |
| Tenure in Lobbying Firm      | -0.0092<br>(0.0120)               | -0.0092<br>(0.0120)    | -0.0432<br>(0.0301)    | -0.0424<br>(0.0307)    | 0.0212<br>(0.0197)                     | -0.0035<br>(0.0151)    | -0.0620<br>(0.0426)   | -0.0701<br>(0.0436)   |
| Specialization               | -0.0196<br>(0.1824)               | -0.0156<br>(0.1815)    | 0.1275<br>(0.4141)     | 0.0674<br>(0.4096)     | 0.1579<br>(0.3421)                     | -0.1505<br>(0.2941)    | 0.4135<br>(0.6092)    | 0.3982<br>(0.5904)    |
| # of Ties to Politicians     | 0.2162**<br>(0.0679)              | 0.2162**<br>(0.0679)   | 0.1629<br>(0.1536)     | 0.1690<br>(0.1541)     | 0.2597*<br>(0.1219)                    | 0.1681+<br>(0.0997)    | 0.3525<br>(0.2519)    | 0.3769<br>(0.2510)    |
| Political Contribution       | 0.0863<br>(0.0942)                | 0.0856<br>(0.0941)     | 0.7155***<br>(0.2028)  | 0.7509***<br>(0.2054)  | 0.3993*<br>(0.1711)                    | 0.2843*<br>(0.1314)    | 0.7753*<br>(0.3420)   | 0.7565*<br>(0.3494)   |
| Competitive Overlap          | -0.0000<br>(0.0001)               | -0.0000<br>(0.0001)    | 0.0002<br>(0.0001)     | 0.0002<br>(0.0001)     | 0.0002+<br>(0.0001)                    | 0.0001<br>(0.0001)     | 0.0002<br>(0.0002)    | 0.0002<br>(0.0002)    |
| Firm Age                     | -0.0123<br>(0.0112)               | -0.0123<br>(0.0112)    | 0.0202<br>(0.0278)     | 0.0231<br>(0.0278)     | -0.0009<br>(0.0179)                    | -0.0056<br>(0.0137)    | 0.0282<br>(0.0413)    | 0.0330<br>(0.0391)    |
| Firm Size                    | 0.0008<br>(0.0025)                | 0.0008<br>(0.0025)     | 0.0012<br>(0.0060)     | 0.0010<br>(0.0061)     | 0.0050<br>(0.0037)                     | 0.0023<br>(0.0033)     | -0.0068<br>(0.0110)   | -0.0074<br>(0.0109)   |
| Law Firm                     | -0.0990<br>(0.1074)               | -0.0983<br>(0.1076)    | 0.4145+<br>(0.2125)    | 0.3894+<br>(0.2161)    | 0.1481<br>(0.1786)                     | 0.0726<br>(0.1458)     | 0.5219<br>(0.3337)    | 0.5413<br>(0.3345)    |
| Lobbying Firm                | -1.1861***<br>(0.1306)            | -1.1863***<br>(0.1308) | -0.1568<br>(0.2817)    | -0.1727<br>(0.2719)    | -0.9039***<br>(0.2291)                 | -0.9439***<br>(0.1936) | -0.1204<br>(0.4461)   | -0.0979<br>(0.4334)   |
| Firm-Employee Distance       | 0.9473**<br>(0.2984)              | 0.9709**<br>(0.3069)   | -0.0080<br>(0.5570)    | -0.4214<br>(0.5753)    | 0.8187<br>(0.5928)                     | 0.8504+<br>(0.4937)    | -0.3985<br>(1.0856)   | -1.1734<br>(1.1788)   |
| Discontinuous Increase       | 1.8902***<br>(0.2304)             | 1.9674***<br>(0.2818)  | 0.8392*<br>(0.4251)    | -0.0093<br>(0.5316)    | 1.1316**<br>(0.3928)                   | 1.0825**<br>(0.3602)   | 0.6836<br>(0.4909)    | -0.0080<br>(0.6600)   |
| Discontinuous X Distance     |                                   | -0.7115<br>(1.6180)    |                        | 9.1227**<br>(3.0635)   |                                        | 0.9263<br>(1.6024)     |                       | 4.3878+<br>(2.6222)   |
| Constant                     | -2.0668***<br>(0.2058)            | -2.0723***<br>(0.2040) | -2.1916***<br>(0.5383) | -2.0756***<br>(0.5415) | -2.3046***<br>(0.3728)                 | -1.8753***<br>(0.3013) | -2.2437**<br>(0.7944) | -2.1005**<br>(0.7806) |
| Period Fixed-effects         | Y                                 | Y                      | Y                      | Y                      | Y                                      | Y                      | Y                     | Y                     |
| Party Fixed-effects          | Y                                 | Y                      | Y                      | Y                      | Y                                      | Y                      | Y                     | Y                     |
| Chamber Fixed-effects        | Y                                 | Y                      | Y                      | Y                      | Y                                      | Y                      | Y                     | Y                     |
| Party Majority Fixed-effects | Y                                 | Y                      | Y                      | Y                      | Y                                      | Y                      | Y                     | Y                     |
| Log pseudolikelihood         | -1817.21                          | -1817.08               | -303.41                | -298.48                | -560.75                                | -853.62                | -130.89               | -129.41               |
| N                            | 9686                              | 9686                   | 555                    | 555                    | 2869                                   | 4286                   | 257                   | 257                   |

a. Standard errors clustered by connected politicians. \*\*\* p<0.001, \*\* p<0.01, \* p<0.05, + p<0.10.

**Table A2: Robustness Checks: Independent Variables (cont'd)<sup>a</sup>**

| DV's                         | Variable : Discontinuous Decrease |                        |                        |                        | Variable : Other Committee Switches |                        |                        |                        |
|------------------------------|-----------------------------------|------------------------|------------------------|------------------------|-------------------------------------|------------------------|------------------------|------------------------|
|                              | Logit Exit                        |                        | Logit Spin-out   Exit  |                        | Logit Exit                          |                        | Logit Spin-out   Exit  |                        |
|                              | Model 9                           | Model 10               | Model 11               | Model 12               | Model 13                            | Model 14               | Model 15               | Model 16               |
| # of Client Ties             | -0.0022<br>(0.0027)               | -0.0022<br>(0.0027)    | 0.0139*<br>(0.0054)    | 0.0140*<br>(0.0055)    | -0.0022<br>(0.0027)                 | -0.0022<br>(0.0027)    | 0.0141**<br>(0.0053)   | 0.0138**<br>(0.0052)   |
| Lobbyist's Revenue           | -0.0000<br>(0.0000)               | -0.0000<br>(0.0000)    | -0.0000<br>(0.0000)    | -0.0000<br>(0.0000)    | -0.0000<br>(0.0000)                 | -0.0000<br>(0.0000)    | -0.0000<br>(0.0000)    | -0.0000<br>(0.0000)    |
| Tenure in Lobbying Firm      | -0.0089<br>(0.0121)               | -0.0088<br>(0.0121)    | -0.0483<br>(0.0308)    | -0.0486<br>(0.0309)    | -0.0086<br>(0.0121)                 | -0.0081<br>(0.0121)    | -0.0449<br>(0.0298)    | -0.0435<br>(0.0297)    |
| Specialization               | -0.0532<br>(0.1817)               | -0.0553<br>(0.1815)    | 0.0603<br>(0.4180)     | 0.0197<br>(0.4257)     | -0.0623<br>(0.1826)                 | -0.0659<br>(0.1829)    | 0.0815<br>(0.4179)     | 0.0733<br>(0.4180)     |
| # of Political Connections   | 0.2011**<br>(0.0669)              | 0.2020**<br>(0.0672)   | 0.1585<br>(0.1552)     | 0.1604<br>(0.1544)     | 0.1903**<br>(0.0663)                | 0.1922**<br>(0.0663)   | 0.1616<br>(0.1571)     | 0.1765<br>(0.1589)     |
| Political Contribution       | 0.1125<br>(0.0937)                | 0.1141<br>(0.0938)     | 0.7814***<br>(0.2110)  | 0.7830***<br>(0.2121)  | 0.1173<br>(0.0941)                  | 0.1185<br>(0.0940)     | 0.7543***<br>(0.2088)  | 0.7527***<br>(0.2086)  |
| Competitive Overlap          | -0.0000<br>(0.0001)               | -0.0000<br>(0.0001)    | 0.0002<br>(0.0001)     | 0.0002<br>(0.0001)     | -0.0000<br>(0.0001)                 | -0.0000<br>(0.0001)    | 0.0002+<br>(0.0001)    | 0.0002+<br>(0.0001)    |
| Firm Age                     | -0.0127<br>(0.0110)               | -0.0127<br>(0.0110)    | 0.0229<br>(0.0274)     | 0.0234<br>(0.0276)     | -0.0124<br>(0.0110)                 | -0.0127<br>(0.0110)    | 0.0200<br>(0.0279)     | 0.0196<br>(0.0279)     |
| Firm Size                    | 0.0005<br>(0.0025)                | 0.0005<br>(0.0025)     | 0.0007<br>(0.0062)     | 0.0009<br>(0.0062)     | 0.0005<br>(0.0025)                  | 0.0005<br>(0.0025)     | 0.0009<br>(0.0060)     | 0.0007<br>(0.0060)     |
| Law Firm                     | -0.0663<br>(0.1095)               | -0.0667<br>(0.1095)    | 0.4429*<br>(0.2166)    | 0.4515*<br>(0.2161)    | -0.0665<br>(0.1095)                 | -0.0661<br>(0.1096)    | 0.4367*<br>(0.2126)    | 0.4364*<br>(0.2147)    |
| Lobbying Firm                | -1.1700***<br>(0.1288)            | -1.1728***<br>(0.1290) | -0.2201<br>(0.2733)    | -0.2312<br>(0.2754)    | -1.1814***<br>(0.1283)              | -1.1821***<br>(0.1284) | -0.1606<br>(0.2828)    | -0.1573<br>(0.2853)    |
| Firm-Employee Distance       | 0.9186**<br>(0.3115)              | 0.9577**<br>(0.3179)   | -0.5883<br>(0.6266)    | -0.5120<br>(0.6234)    | 0.9083**<br>(0.3013)                | 0.8536**<br>(0.3059)   | -0.0356<br>(0.5528)    | -0.1667<br>(0.5895)    |
| Discontinuous Increase       | 1.5535***<br>(0.2080)             | 1.5596***<br>(0.2085)  | 0.1327<br>(0.3744)     | 0.1490<br>(0.3752)     | 1.5393***<br>(0.1725)               | 1.5424***<br>(0.1726)  | 0.6621*<br>(0.2995)    | 0.6595*<br>(0.3011)    |
| Increase X Distance          | -0.0203<br>(0.9797)               | -0.0573<br>(0.9825)    | 3.8985*<br>(1.7253)    | 3.8240*<br>(1.7202)    |                                     |                        |                        |                        |
| Discontinuous Decrease       | -0.2820<br>(0.2590)               | -0.1452<br>(0.2916)    | 0.8271<br>(0.5158)     | 1.5659+<br>(0.8881)    |                                     |                        |                        |                        |
| Decrease X Distance          |                                   | -0.8835<br>(1.0076)    |                        | -5.1960<br>(4.1340)    |                                     |                        |                        |                        |
| Committee Switch             |                                   |                        |                        |                        | 0.1717<br>(0.2494)                  | -0.0149<br>(0.3051)    | -0.3043<br>(0.3982)    | -0.8695<br>(0.7650)    |
| Switch X Distance            |                                   |                        |                        |                        |                                     | 1.1179<br>(1.1287)     |                        | 2.7755<br>(2.5311)     |
| Constant                     | -2.1206***<br>(0.2057)            | -2.1222***<br>(0.2059) | -2.0514***<br>(0.5310) | -2.0297***<br>(0.5283) | -2.1080***<br>(0.2066)              | -2.1037***<br>(0.2068) | -2.1708***<br>(0.5369) | -2.1628***<br>(0.5389) |
| Period Fixed-effects         | Y                                 | Y                      | Y                      | Y                      | Y                                   | Y                      | Y                      | Y                      |
| Party Fixed-effects          | Y                                 | Y                      | Y                      | Y                      | Y                                   | Y                      | Y                      | Y                      |
| Chamber Fixed-effects        | Y                                 | Y                      | Y                      | Y                      | Y                                   | Y                      | Y                      | Y                      |
| Party Majority Fixed-effects | Y                                 | Y                      | Y                      | Y                      | Y                                   | Y                      | Y                      | Y                      |
| Log pseudolikelihood         | -1810.34                          | -1810.13               | -300.07                | -299.54                | -1810.63                            | -1810.14               | -303.50                | -302.93                |
| N                            | 9686                              | 9686                   | 555                    | 555                    | 9686                                | 9686                   | 555                    | 555                    |

a. Standard errors clustered by connected politicians. \*\*\* p<0.001, \*\* p<0.01, \* p<0.05, + p<0.10. The results are robust to only with discontinuous increases due to a connected politician becoming a chair (M1-M4) and as a result of close elections (M5-M8). We cannot replicate the results with discontinuous decreases in the value of relational capital after the depositions of connected politicians (M9-M12) and connected politicians' assignments to non-powerful committees (M9-M12).

**Table A3: Robustness Checks: Decomposition of Distance Measure<sup>a</sup>**

| DV's                            | Logit                  |                        |                        |                        |                        |                        | Conditional Logit     |                       |                       |                       |
|---------------------------------|------------------------|------------------------|------------------------|------------------------|------------------------|------------------------|-----------------------|-----------------------|-----------------------|-----------------------|
|                                 | Exit                   |                        | Spin-out               |                        | Spin-out   Exit        |                        | Exit                  |                       | Spin-out              |                       |
|                                 | Model 1                | Model 2                | Model 3                | Model 4                | Model 5                | Model 6                | Model 7               | Model 8               | Model 9               | Model 10              |
| # of Client Ties                | -0.0021<br>(0.0027)    | -0.0021<br>(0.0027)    | 0.0053+<br>(0.0032)    | 0.0053+<br>(0.0032)    | 0.0138*<br>(0.0054)    | 0.0139*<br>(0.0054)    | -0.0079<br>(0.0065)   | -0.0079<br>(0.0065)   | 0.0261+<br>(0.0140)   | 0.0264+<br>(0.0140)   |
| Lobbyist's Revenue              | -0.0000<br>(0.0000)    | -0.0000<br>(0.0000)    | -0.0000<br>(0.0000)    | -0.0000<br>(0.0000)    | -0.0000<br>(0.0000)    | -0.0000<br>(0.0000)    | 0.0000<br>(0.0000)    | 0.0000<br>(0.0000)    | 0.0000<br>(0.0000)    | 0.0000<br>(0.0000)    |
| Tenure in Lobbying Firm         | -0.0068<br>(0.0122)    | -0.0068<br>(0.0122)    | -0.0399+<br>(0.0224)   | -0.0401+<br>(0.0223)   | -0.0470<br>(0.0308)    | -0.0455<br>(0.0309)    | 0.3185***<br>(0.0429) | 0.3180***<br>(0.0427) | 0.0674<br>(0.0611)    | 0.0628<br>(0.0602)    |
| Specialization                  | -0.0172<br>(0.1880)    | -0.0164<br>(0.1881)    | 0.0702<br>(0.3298)     | 0.0833<br>(0.3254)     | 0.1438<br>(0.4229)     | 0.1588<br>(0.4211)     | 1.0733*<br>(0.4541)   | 1.0740*<br>(0.4539)   | 0.1600<br>(0.9176)    | 0.0978<br>(0.9120)    |
| # of Political Connections      | 0.1947**<br>(0.0658)   | 0.1948**<br>(0.0658)   | 0.1908+<br>(0.1070)    | 0.1912+<br>(0.1070)    | 0.1710<br>(0.1559)     | 0.1577<br>(0.1553)     | 0.4710+<br>(0.2715)   | 0.4696+<br>(0.2716)   | 0.8822<br>(0.5569)    | 0.8613<br>(0.5475)    |
| Political Contribution          | 0.1082<br>(0.0938)     | 0.1080<br>(0.0939)     | 0.5108**<br>(0.1735)   | 0.5063**<br>(0.1735)   | 0.7724***<br>(0.2126)  | 0.7639***<br>(0.2119)  | -0.0243<br>(0.1887)   | -0.0301<br>(0.1884)   | 0.5423<br>(0.3670)    | 0.5130<br>(0.3569)    |
| Competitive Overlap             | -0.0000<br>(0.0001)    | -0.0000<br>(0.0001)    | 0.0001<br>(0.0001)     | 0.0001<br>(0.0001)     | 0.0002<br>(0.0001)     | 0.0002<br>(0.0001)     | -0.0001<br>(0.0001)   | -0.0001<br>(0.0001)   | 0.0001<br>(0.0003)    | 0.0001<br>(0.0003)    |
| Firm Age                        | -0.0144<br>(0.0111)    | -0.0143<br>(0.0110)    | -0.0020<br>(0.0205)    | -0.0011<br>(0.0203)    | 0.0233<br>(0.0276)     | 0.0236<br>(0.0276)     | 0.0309<br>(0.0215)    | 0.0313<br>(0.0215)    | 0.2396***<br>(0.0638) | 0.2419***<br>(0.0652) |
| Firm Size                       | -0.0002<br>(0.0027)    | -0.0002<br>(0.0027)    | 0.0001<br>(0.0050)     | 0.0000<br>(0.0050)     | 0.0004<br>(0.0062)     | 0.0004<br>(0.0063)     | -0.0011<br>(0.0063)   | -0.0013<br>(0.0065)   | 0.0259+<br>(0.0150)   | 0.0269+<br>(0.0157)   |
| Law Firm                        | -0.0624<br>(0.1090)    | -0.0623<br>(0.1090)    | 0.2856+<br>(0.1666)    | 0.2875+<br>(0.1668)    | 0.4569*<br>(0.2156)    | 0.4682*<br>(0.2150)    | -0.0138<br>(0.2039)   | -0.0136<br>(0.2040)   | 0.0917<br>(0.4799)    | 0.1263<br>(0.4897)    |
| Lobbying Firm                   | -1.2259***<br>(0.1333) | -1.2258***<br>(0.1333) | -1.2195***<br>(0.2466) | -1.2123***<br>(0.2465) | -0.1893<br>(0.2854)    | -0.1778<br>(0.2860)    | -0.0710<br>(0.2649)   | -0.0715<br>(0.2653)   | -1.6090*<br>(0.7200)  | -1.6317*<br>(0.7195)  |
| Firm-Employee Overlap           | 1.0188**<br>(0.3600)   | 1.0276**<br>(0.3554)   | 0.2178<br>(0.7157)     | 0.5943<br>(0.6513)     | -0.6653<br>(0.8068)    | -0.2736<br>(0.7685)    | 0.3400<br>(0.5042)    | 0.3949<br>(0.5012)    | 0.0084<br>(0.9474)    | 0.2257<br>(0.9228)    |
| Firm-Employee Complementarity   | -0.9180<br>(1.2549)    | -0.9609<br>(1.2632)    | 0.8362<br>(2.1906)     | -0.3723<br>(2.3286)    | 0.9036<br>(2.7210)     | -0.4599<br>(2.8803)    | -1.2652<br>(1.6801)   | -1.3969<br>(1.6865)   | 2.0570<br>(3.3499)    | 1.1280<br>(3.2361)    |
| Discontinuous Increase          | 1.5459***<br>(0.1987)  | 1.5390***<br>(0.1932)  | 1.3864***<br>(0.3126)  | 1.4031***<br>(0.3094)  | 0.0168<br>(0.3760)     | 0.0510<br>(0.3662)     | 1.5068***<br>(0.3880) | 1.5580***<br>(0.3842) | 1.4664*<br>(0.6591)   | 1.3909*<br>(0.6142)   |
| Discontinuous X Overlap         | 0.0965<br>(0.6676)     |                        | 2.0630*<br>(0.9261)    |                        | 3.3573*<br>(1.3605)    |                        | 1.2477<br>(1.4277)    |                       | 4.8992<br>(3.3965)    |                       |
| Discontinuous X Complementarity |                        | 0.4393<br>(1.9580)     |                        | 6.3125*<br>(2.8902)    |                        | 11.0098*<br>(4.7394)   |                       | 2.9820<br>(4.2250)    |                       | 18.1406**<br>(7.0080) |
| Constant                        | -2.0950***<br>(0.2048) | -2.0955***<br>(0.2052) | -4.1382***<br>(0.4152) | -4.1646***<br>(0.4174) | -2.1286***<br>(0.5362) | -2.1209***<br>(0.5365) |                       |                       |                       |                       |
| Period Fixed-effects            | Y                      | Y                      | Y                      | Y                      | Y                      | Y                      | Y                     | Y                     | Y                     | Y                     |
| Party Fixed-effects             | Y                      | Y                      | Y                      | Y                      | Y                      | Y                      | Y                     | Y                     | Y                     | Y                     |
| Chamber Fixed-effects           | Y                      | Y                      | Y                      | Y                      | Y                      | Y                      | Y                     | Y                     | Y                     | Y                     |
| Party Majority Fixed-effects    | Y                      | Y                      | Y                      | Y                      | Y                      | Y                      | Y                     | Y                     | Y                     | Y                     |
| Log pseudolikelihood            | -1809.30               | -1809.28               | -671.14                | -671.14                | -300.07                | -299.84                | -798.46               | -798.71               | -209.13               | -208.03               |
| N                               | 9686                   | 9686                   | 9686                   | 9686                   | 555                    | 555                    | 4512                  | 4512                  | 1730                  | 1730                  |

a. Standard errors clustered by connected politicians. \*\*\*  $p < 0.001$ , \*\*  $p < 0.01$ , \*  $p < 0.05$ , +  $p < 0.10$ . We decompose firm-employee distance into overlap and complementarity between the firm and the employee. Both overlap and complementarity positively moderate the relationship between discontinuous increases and employee entrepreneurship but not mobility to established firms.
